# Supplementary material for: N,P co-doped microporous carbon as a metal-free catalyst for the selective oxidation of alcohols by air in water
Source: Royal Society of Chemistry journal article supplement (doi:10.1039/d1nj02042k), 2021-01-01
Supplement: d1nj02042k1.pdf [file d1nj02042k1.pdf]

Supporting Information

**N, P co-doped microporous carbon as metal-free catalyst for  
selective oxidation of alcohols with air in water**

Chen Xing<sup>a</sup>, Yan Zhang<sup>a</sup>, Yang Gao<sup>a\*</sup>, Yijun Kang<sup>b\*</sup> and Shiguo Zhang<sup>a\*</sup>

<sup>a</sup> College of Materials Science and Engineering, Hunan province key laboratory for advanced carbon materials and applied technology, Hunan University, Changsha 410082, China.

<sup>b</sup> Department of spine surgery, the Second Xiangya Hospital, Central South University, Changsha 410011, China.

\* E-mail: [ygao@hnu.edu.cn](mailto:ygao@hnu.edu.cn), [kangyijun@csu.edu.cn](mailto:kangyijun@csu.edu.cn), [zhangsg@hnu.edu.cn](mailto:zhangsg@hnu.edu.cn)

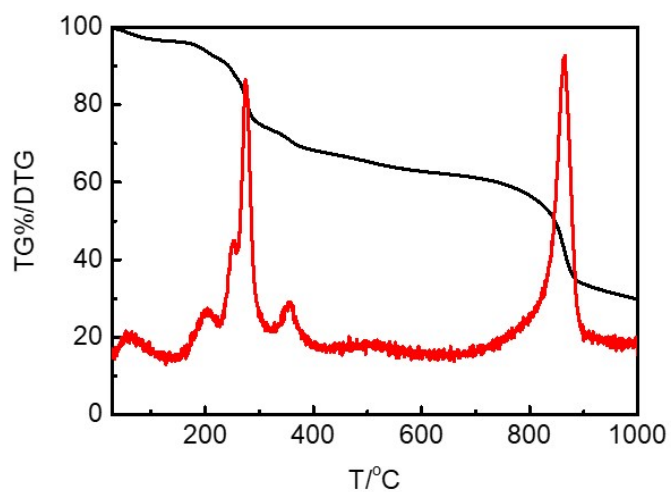

**Figure S1.** TG/DTA curves of pPDA-PA aerogel.

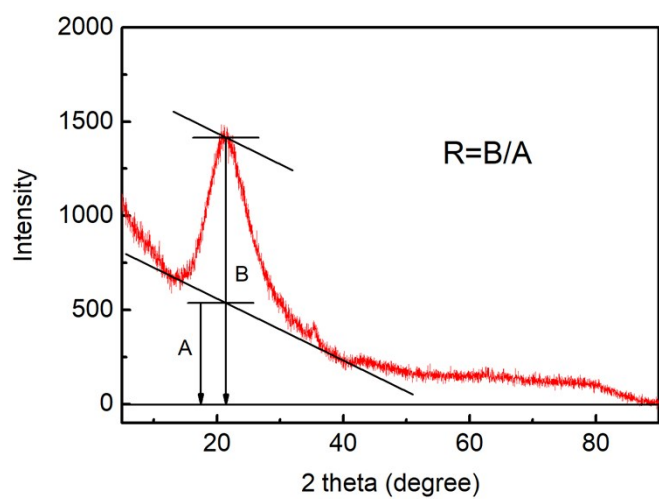

**Figure S2.** A sketch map for the calculation of the R values.

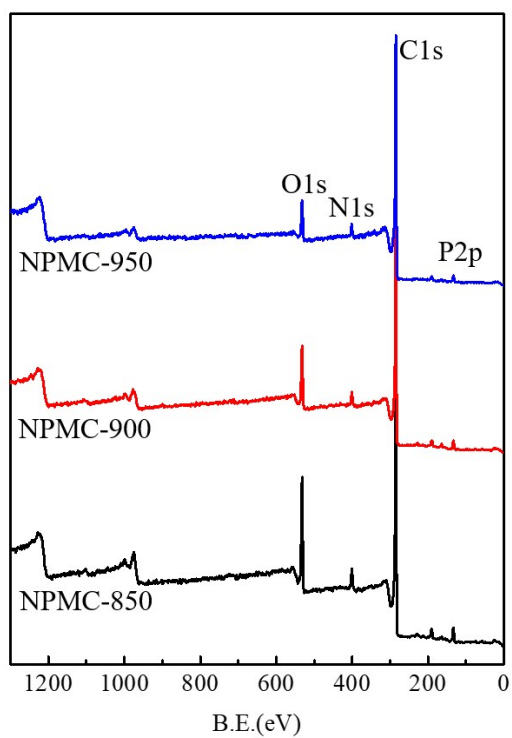

**Figure S3.** XPS survey spectra of the NPMCs.

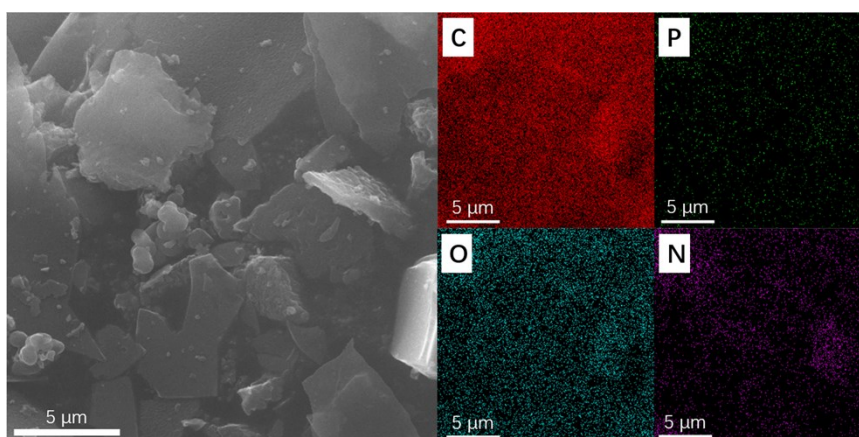

**Figure S4.** Energy-dispersive spectroscopy (EDS) elemental mapping images of NPMC-900.

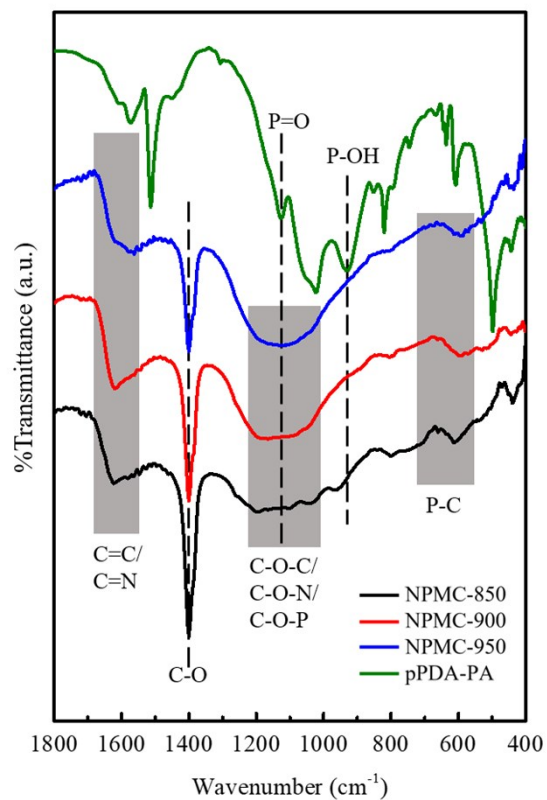

**Figure S5.** FT-IR spectra of NPMCs

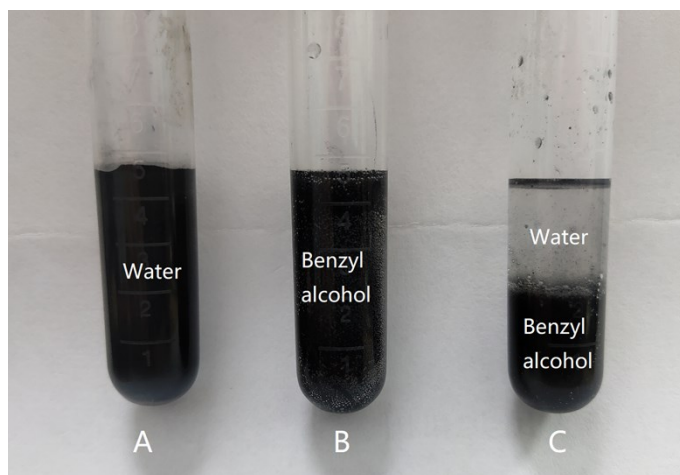

**Figure S6.** Photographs of NPMC-900 dispersed in water (A), Benzyl alcohol (B) and Water/Benzyl alcohol mixture (C).

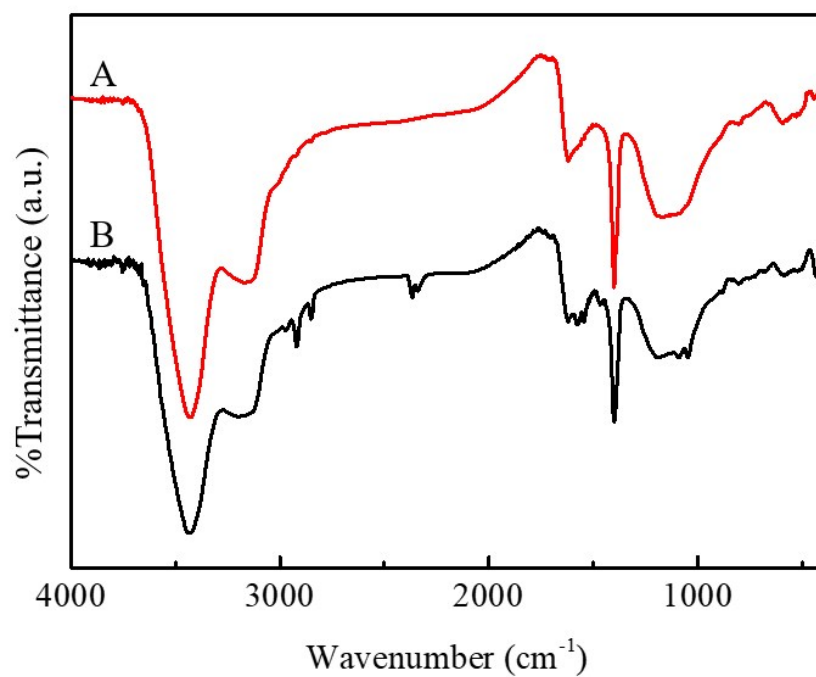

**Figure S7.** FT-IR spectra of NPMC-900 (A) and recovered NPMC-900 (B)

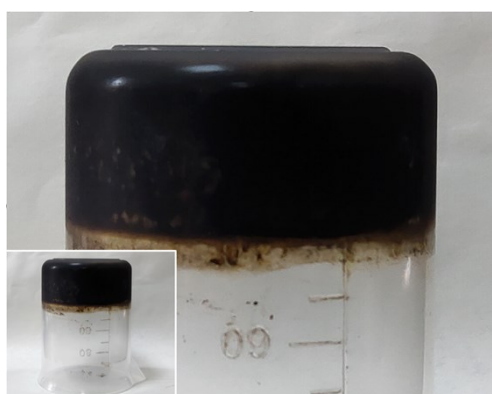

**Figure S8.** Photos of pPDA-PA hydrogel

**Table S1.** Carbon yields and porous structure of NPMCs

| Catalyst | Yield/% | $S_{\text{BET}}/\text{m}^2 \text{g}^{-1}$ | $S_{\text{micro}}/\text{m}^2 \text{g}^{-1}$ | $V_{\text{tot}}/\text{m}^3 \text{g}^{-1}$ | $V_{\text{micro}}/\text{m}^3 \text{g}^{-1}$ |
|----------|---------|-------------------------------------------|---------------------------------------------|-------------------------------------------|---------------------------------------------|
| NPMC-850 | 24.07   | 621                                       | 581                                         | 0.351                                     | 0.292                                       |
| NPMC-900 | 20.85   | 676                                       | 613                                         | 0.439                                     | 0.346                                       |
| NPMC-950 | 18.19   | 731                                       | 674                                         | 0.443                                     | 0.351                                       |
| NPC-900  | 22.36   | 227                                       | 214                                         | 0.134                                     | 0.113                                       |

**Table S2.** Raman spectra data of NPMCs

| Catalyst | G/cm <sup>-1</sup> | D/cm <sup>-1</sup> | $I_{\text{G}}/I_{\text{D}}$ |
|----------|--------------------|--------------------|-----------------------------|
| NPMC-850 | 1590               | 1354               | 1.01                        |
| NPMC-900 | 1594               | 1353               | 1.01                        |
| NPMC-950 | 1596               | 1354               | 1.00                        |

**Table S3.** Calculated atomic % of C, P, N and O for NPMCs

| Catalyst | P at% | C at% | N at% | O at% | Total |
|----------|-------|-------|-------|-------|-------|
| NPMC-850 | 3.09  | 76.08 | 5.27  | 15.56 | 100   |
| NPMC-900 | 2.72  | 81.00 | 4.14  | 12.14 | 100   |
| NPMC-950 | 2.04  | 86.86 | 3.63  | 7.47  | 100   |

**Table S4.** Calculated % of P-C and P-O present in NPMCs

| Catalyst | Absolute % |       |       | Relative % |       |       |
|----------|------------|-------|-------|------------|-------|-------|
|          | % P-C      | % P-O | Total | % P-C      | % P-O | Total |
| NPMC-850 | 1.05       | 2.04  | 3.09  | 34.05      | 65.95 | 100   |
| NPMC-900 | 0.73       | 1.99  | 2.72  | 27.16      | 72.84 | 100   |
| NPMC-950 | 0.64       | 1.40  | 2.04  | 31.31      | 68.69 | 100   |

**Table S5.** Calculated % of different type of oxygen present in NPMCs

| Catalyst | Absolute %    |                         |       | Relative %    |                         |       |
|----------|---------------|-------------------------|-------|---------------|-------------------------|-------|
|          | % C=O/<br>P=O | % C-O/<br>P-O-C/<br>P-O | Total | % C=O/<br>P=O | % C-O/<br>P-O-C/<br>P-O | Total |
| NPMC-850 | 4.01          | 11.56                   | 15.57 | 25.75         | 74.25                   | 100   |
| NPMC-900 | 3.57          | 8.56                    | 12.13 | 29.42         | 70.58                   | 100   |
| NPMC-950 | 2.54          | 4.93                    | 7.47  | 34.03         | 65.97                   | 100   |

**Table S6.** Calculated % of different type of nitrogen present in NPMCs

| Catalyst | Absolute %  |            |             |            |       |
|----------|-------------|------------|-------------|------------|-------|
|          | pyridinic N | pyrrolic N | graphitic N | oxidized N | Total |
| NPMC-850 | 1.04        | 1.54       | 2.28        | 0.41       | 5.27  |
| NPMC-900 | 0.69        | 0.83       | 1.99        | 0.63       | 4.14  |
| NPMC-950 | 0.37        | 0.56       | 2.18        | 0.52       | 3.63  |
|          | Relative %  |            |             |            |       |
|          | pyridinic N | pyrrolic N | graphitic N | oxidized N | Total |
| NPMC-850 | 19.74       | 29.15      | 43.28       | 7.83       | 100   |
| NPMC-900 | 16.61       | 20.01      | 48.04       | 15.34      | 100   |
| NPMC-950 | 10.22       | 15.29      | 60.20       | 14.29      | 100   |

**Table S7.** Results of the selective oxidation of benzyl alcohols in water over different catalysts

| Entry | Catalyst   | Conv. <sup>b</sup> /% | Sel. <sup>b</sup> /% |
|-------|------------|-----------------------|----------------------|
| 1     | NPMC- 800  | 85                    | >99                  |
| 2     | NPMC- 1000 | 50                    | >99                  |

<sup>a</sup> Reaction conditions: benzyl alcohol (0.5 mmol), catalyst (50 mg), water (1 mL), 1-atm air initially filled in the pressure bottle, 120 °C, 5 h; <sup>b</sup> determined by GC.

**Table S8.** Performance of reported metal-free catalysts for selective oxidation of benzyl alcohol

| Entry | Ref.      | Cat.                           | m(cat.) | Benzyl alcohol | solvent     | T /°C | T /h | oxidant                        | Conv . % | Sel. % |
|-------|-----------|--------------------------------|---------|----------------|-------------|-------|------|--------------------------------|----------|--------|
| 1     | This work | NPMC-900                       | 50mg    | 0.5mmol        | water       | 120   | 5    | air                            | 99       | >99    |
| 2     | [8]       | PGc                            | 50mg    | 100mg          | water       | 100   | 24   | O <sub>2</sub>                 | 90       | 96     |
| 3     | [15]      | H <sub>2</sub> SO <sub>4</sub> | 1mmol   | 1mmol          | DMSO        | 150   | 1    | H <sub>2</sub> SO <sub>4</sub> | 99       | 94     |
| 4     | [16]      | AC                             | 100mg   | 1.1mmol        | ethanol     | 120   | 5    | air                            | 23       | >99    |
| 5     | [18]      | NG-900                         | 30mg    | 0.1mmol        | water       | 70    | 10   | O <sub>2</sub>                 | 13       | >99    |
| 6     | [19]      | GO                             | 100mg   | 50 mg          | -           | 150   | 24   | air                            | 99       | 85     |
| 7     | [42]      | NSC                            | 10mg    | 1mmol          | 1,4-dioxane | 90    | 5    | HNO <sub>3</sub>               | 96       | 92     |
| 8     | [43]      | PS-Gc                          | 50mg    | 0.1 mL         | water       | 80    | 48   | O <sub>2</sub>                 | 54       | 88     |
| 9     | [44]      | Au/NPC                         | 20mg    | 0.5mmol        | Toluene     | 25    | 1    | O <sub>2</sub>                 | 99       | >99    |
| 10    | [45]      | Pd <sub>NPs</sub> @PANI/HNS    | 20mg    | 1mmol          | Toluene     | 80    | 5    | O <sub>2</sub>                 | 95       | 95     |

**Table S9.** Porous structure of NPMC-900 and recovered NPMC-900

| Catalyst        | S <sub>BET</sub> | S <sub>micro</sub> /m <sup>2</sup> g <sup>-1</sup> | V <sub>tot</sub> /m <sup>3</sup> g <sup>-1</sup> | V <sub>micro</sub> /m <sup>3</sup> g <sup>-1</sup> |
|-----------------|------------------|----------------------------------------------------|--------------------------------------------------|----------------------------------------------------|
| NPMC-900        | 676              | 613                                                | 0.439                                            | 0.346                                              |
| Reused NPMC-900 | 681              | 614                                                | 0.445                                            | 0.348                                              |
